# Supplementary material for: Nitrogen-doped bamboo-like carbon nanotubes as anode material for high performance potassium ion batteries
Source: Royal Society of Chemistry journal article supplement (doi:10.1039/c8ta04694h), 2018-01-01
Supplement: c8ta04694h1.pdf [file c8ta04694h1.pdf]

## Electronic Supporting Information

### **Nitrogen-doped bamboo-like carbon nanotubes as anode material for high performance Potassium-ion batteries**

Yanzhen liu<sup>a,b,d</sup>, Chenghao Yang<sup>a,b\*</sup>, Qichang Pan<sup>a,b</sup>, Youpeng Li<sup>a,b</sup>, Gang Wang<sup>a</sup>, Xing Ou<sup>a,b</sup>, Fenghua Zheng<sup>a,b</sup>, Xunhui Xiong<sup>a</sup>, Meilin Liu<sup>a,c</sup>, Qinyuan Zhang<sup>d</sup>

a: Guangzhou Key Laboratory for Surface Chemistry of Energy Materials, New Energy Research Institute, School of Environment and Energy, South China University of Technology, Guangzhou 510006, China

b: Guangdong Engineering and Technology Research Center for Surface Chemistry of Energy Materials, New Energy Research Institute, School of Environment and Energy, South China University of Technology, Guangzhou 510006, PR China

c: School of Materials Science & Engineering, Georgia Institute of Technology, Atlanta 30332-0245, Georgia

d: State Key Laboratory of Luminescent Materials and Devices and Institute of Optical Communication Materials, South China University of Technology, Guangzhou 510641, China

### **Experimental Section**

#### **Synthesis of NBCNTs**

Firstly, 0.5 g of  $\text{Co}(\text{CH}_3\text{COO})_2 \cdot 4\text{H}_2\text{O}$  and 10 g of urea were mixed with 20 mL of distilled water, and then vigorously stirred until the raw materials were completely dissolved. Subsequently, the solution was heated at 80°C to evaporate the solvent. The obtained mixture powder was then annealed at 800°C for 1 h or 2 h under Ar atmosphere,

with a heating rate of  $3^{\circ}\text{C min}^{-1}$ . After that, the residuum was dissolved in 2 M HCl solution for 48 h. Finally, the product was obtained by washing with distilled water several times and then dried overnight in a vacuum oven at  $80^{\circ}\text{C}$ .

### **Characterization**

The specimens of samples were examined by using X-ray diffraction (XRD) technique (Bruker D8 Advance (Germany) with Cu  $K\alpha$  radiation,  $\lambda = 1.5418 \text{ \AA}$ ). The morphology of the samples were studied with scanning electron microscopy (SEM, FEI Quanta 200 FEG) and high-resolution transmission electron microscopy (HRTEM, Tecnai G2 F20 S-TWIN, Japan) operating at 200 KV. XPS was performed on a Thermo K-Alpha XPS spectrometer (Thermo Fisher Scientific) equipped with a monochromatic Al  $K\alpha$  X-ray source ( $h\nu = 1468.6 \text{ eV}$ ). Raman spectroscopic measurement was performed using a Renishaw RM1000 microspectroscopic system.

### **Electrochemical Tests**

The active material electrodes were composed of the NBCNTs, carbon black, and a binder of polyvinylidene fluoride (PVDF) with a mass ratio of 80:10:10. Cu foil was used as current collector, and the 2032-type coin cells were fabricated in glovebox filled with Ar. The mass loading of the active material was about  $0.5 \text{ mg cm}^{-2}$ . The K disks, glass-fiber, and 0.8 M KPF<sub>6</sub> in EC: DEC (1:1) were utilized as the counter/reference electrode, separator, and electrolyte, respectively. The K disks were made by rolling potassium lumps into a thin plate, and were then cut into circulated disks in glove box with water/oxygen content lower than 1 ppm. Galvanostatic charge and discharge measurements were carried out using a LAND CT2001A battery testing system (Wuhan,

China) within the voltage range of 0.01–3.0 V. Cyclic voltammetry (CV) measurements were performed using a CHI660A electrochemical workstation at a scan rate of 0.1 mV s<sup>-1</sup> from 0.01 to 3.0 V.

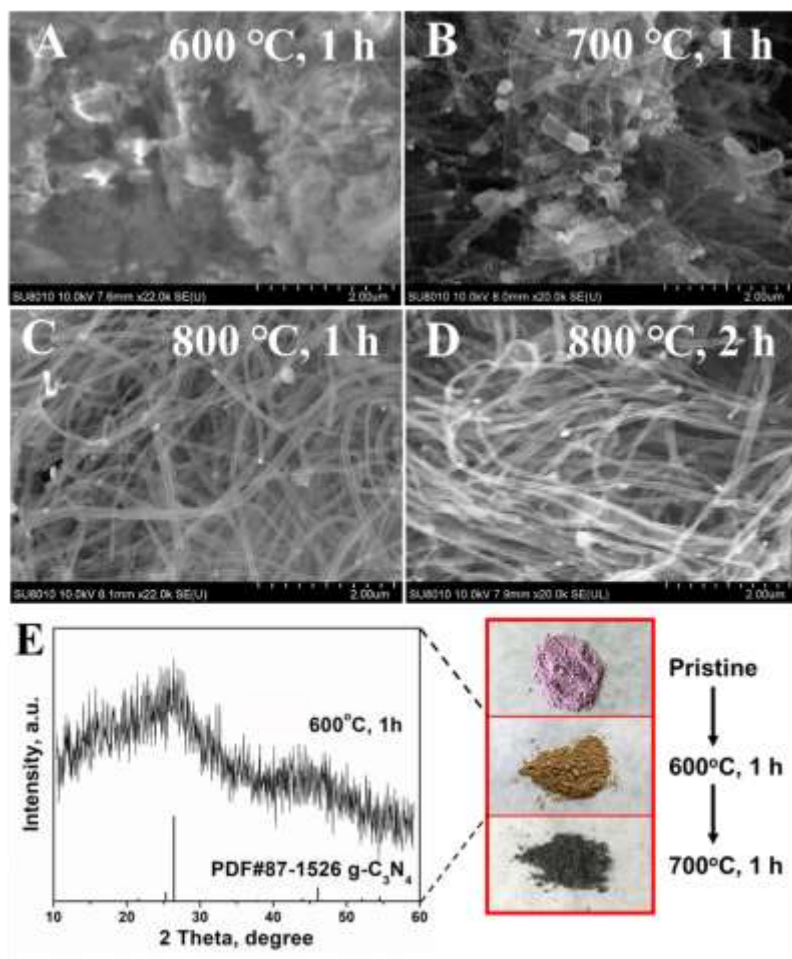

Figure. S1 SEM images of samples annealed at 600°C for 1h (A), 700°C for 1h (B), 800°C for 1h (C), 800°C for 2h (D), and the XRD pattern of sample annealed at 600°C for 1h and the digital photos of samples at different temperatures (E).

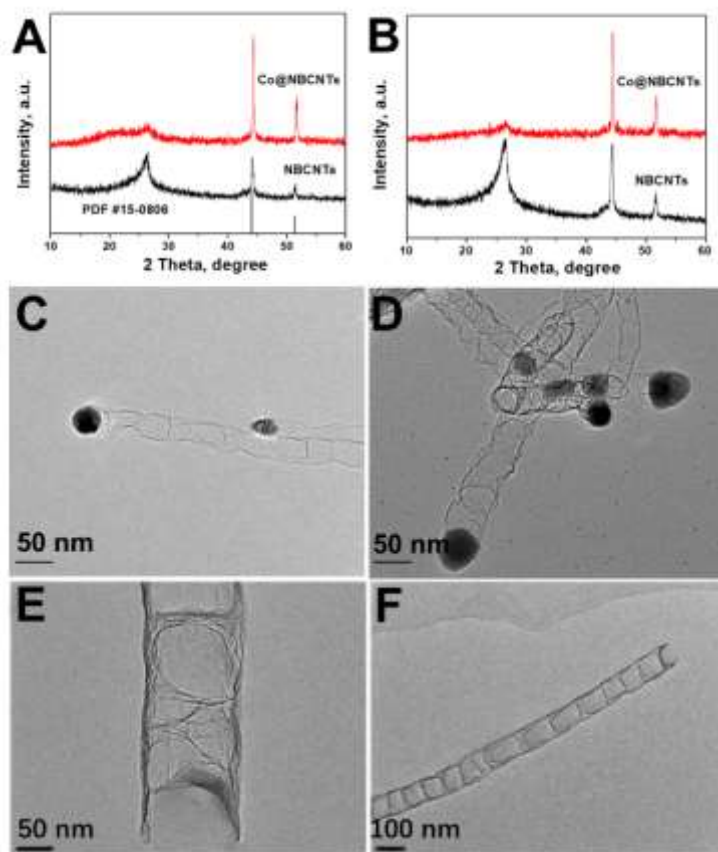

Figure. S2 XRD patterns of NBCNTs-1 (A) and NBCNTs-2 before and after removing Co, and TEM images of NBCNTs-1 (C) and NBCNTs-2 (D) after removing Co.

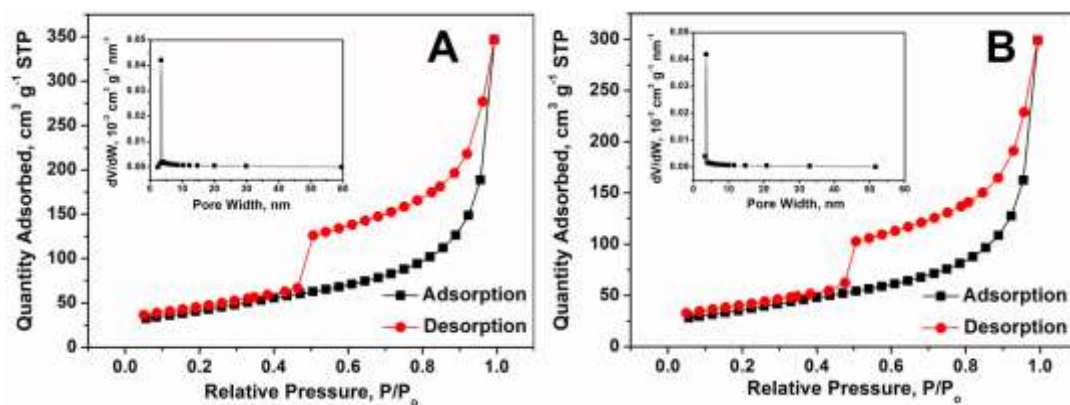

Figure. S3 Nitrogen adsorption-desorption isotherm and pore size distribution (insert) of NBCNTs-1 (A) and NBCNTs-2 (B).

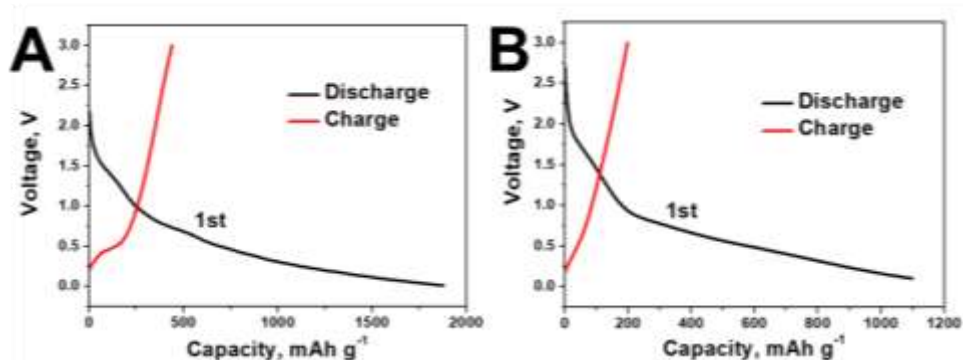

Figure S4. First cycle charge-discharge profiles at 500 mA g<sup>-1</sup> of NBCNTs-1 (A) and NBCNTs-2 (B).

Table S1. Comparison of the K storage performance with reported carbonaceous materials.

| Types of materials  | Current density (mA g <sup>-1</sup> ) | Cycle number | Specific capacity (mAh g <sup>-1</sup> ) | Ref.      |
|---------------------|---------------------------------------|--------------|------------------------------------------|-----------|
| Carbon microspheres | 28                                    | 100          | 216                                      | r1        |
| N-doped CNFs        | 279                                   | 1900         | 170                                      | r2        |
| Mesoporous carbon   | 1000                                  | 1000         | 146.5                                    | r3        |
| N-doped CNTs        | 2000                                  | 500          | 102                                      | r4        |
| N-rich hard carbon  | 504                                   | 4000         | 180                                      | r5        |
| Porous CNFs paper   | 200                                   | 1200         | 211                                      | r6        |
| N/O doped carbon    | 50                                    | 100          | 230.6                                    | r7        |
| Graphite            | 200                                   | 500          | 174                                      | r8        |
| N-doped CNTs        | 500                                   | 1000         | 204                                      | This work |

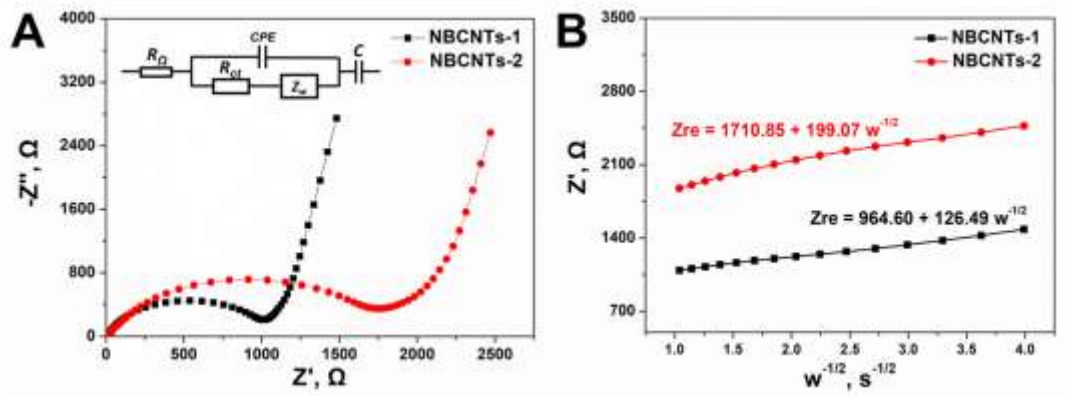

Figure S5. Electrochemical impedance spectroscopy for NBCNTs-1 and NBCNTs-2 and equivalent circuit (insert) (A), and the corresponding relationship of the plots real impedance components and the inverse square root of frequency (B).

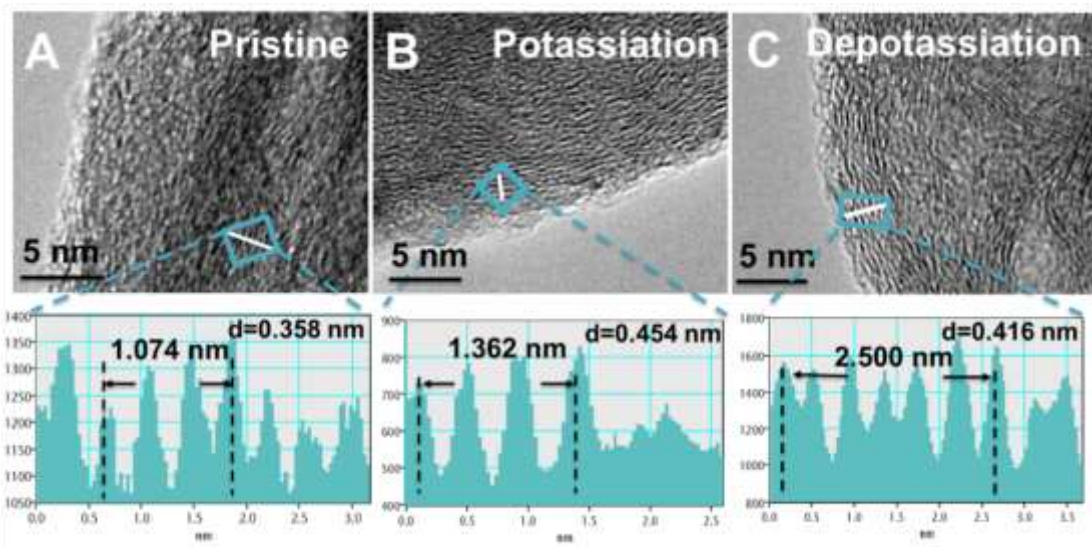

Figure S6. HRTEM images of A) pristine NBCNTs-1 and those at B) discharging to 0.01 V and C) charging to 3.0 V with the lattice distances of the corresponding samples.

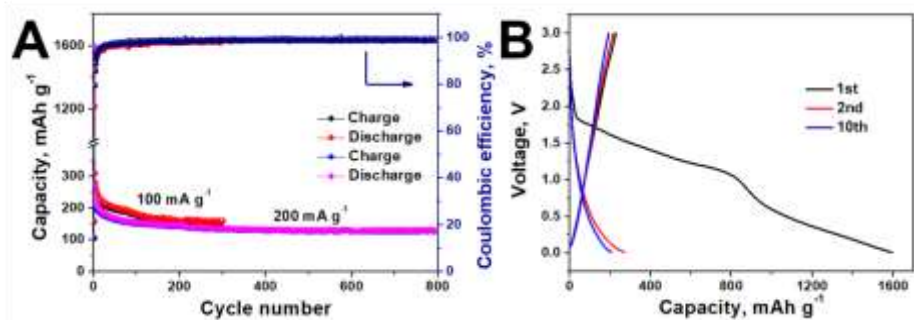

Figure S7. Cycle performance (A) and charge-discharge profiles (B) of NBCNTs-1 as anode material for SIBs.

References:

- [r1] Z. Jian, Z. Xing, C. Bommier, Z. Li and X. Ji, *Adv. Energy Mater.*, 2016, **6**, 1501874.
- [r2] R. A. Adams, J. M. Syu, Y. Zhao, C. T. Lo, A. Varma and V. G. Pol, *ACS Appl. Mat. Interfaces*, 2017, **9**, 17872.
- [r3] W. Wang, J. Zhou, Z. Wang, L. Zhao, P. Li, Y. Yang, C. Yang, H. Huang and S. Guo, *Adv. Energy Mater.*, 2018, **8**, 1701648.
- [r4] P. Xiong, X. Zhao and Y. Xu, *Chemsuschem*, 2017, **11**.
- [r5] C. Chen, Z. Wang, B. Zhang, L. Miao, J. Cai, L. Peng, Y. Huang, J. Jiang, Y. Huang and L. Zhang, *Energy Storage Materials*, 2017, **8**, 161-168.
- [r6] X. Zhao, P. Xiong, J. Meng, Y. Liang, J. Wang and Y. Xu, *J. Mater. Chem. A*, 2017, **5**.
- [r7] J. Yang, Z. Ju, Y. Jiang, Z. Xing, B. Xi, J. Feng and S. Xiong, *Adv. Mater.*, 2018, **30**, 1700104.
- [r8] Y. An, H. Fei, G. Zeng, L. Ci, B. Xi, S. Xiong and J. Feng, *J. Power Sources*, 2018, **378**, 66-72.
